# Supplementary material
Source: PubMed Central journal article supplement (PMC5534177)

289-001 Right middle cingulate gyrus stimulation  
Stimulation site (10.4, 20.8, -10.5)

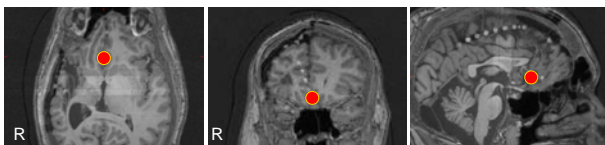

BOLD response

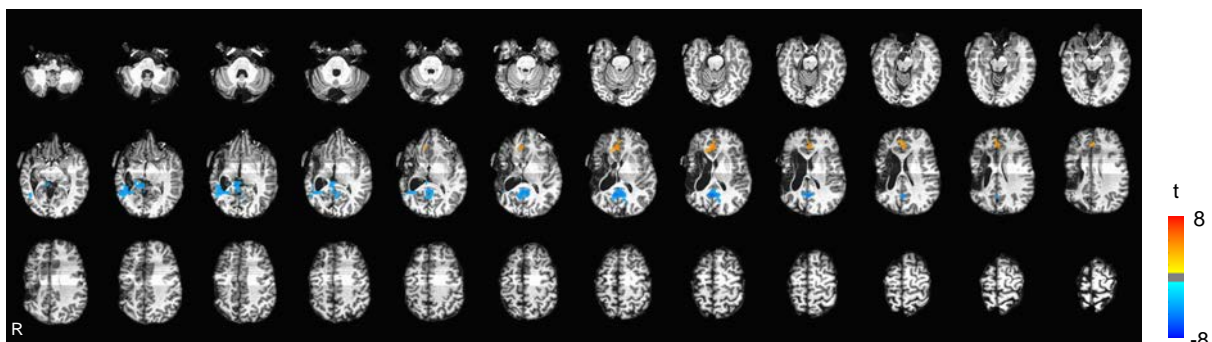

Brain mask

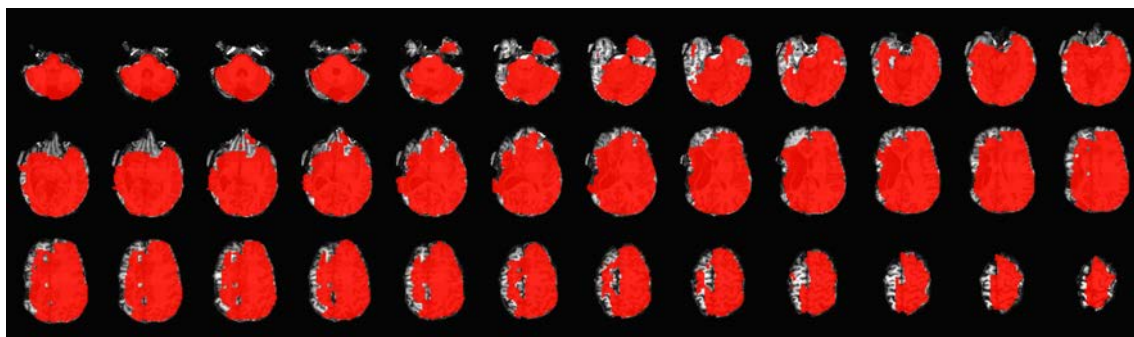

289-002 Right subgenual cingulate gyrus stimulation  
Stimulation site (9.5, 23.7, 3.7)

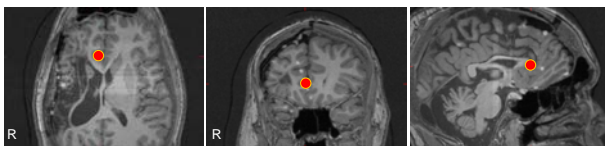

BOLD response

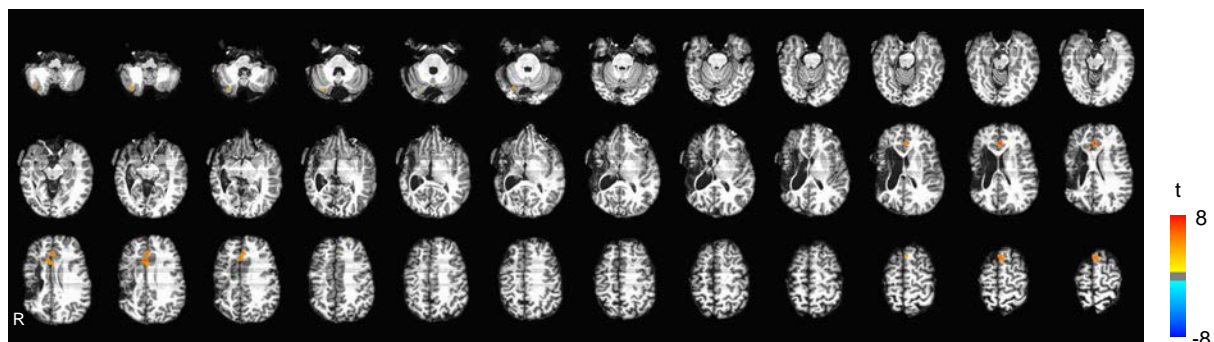

Brain mask

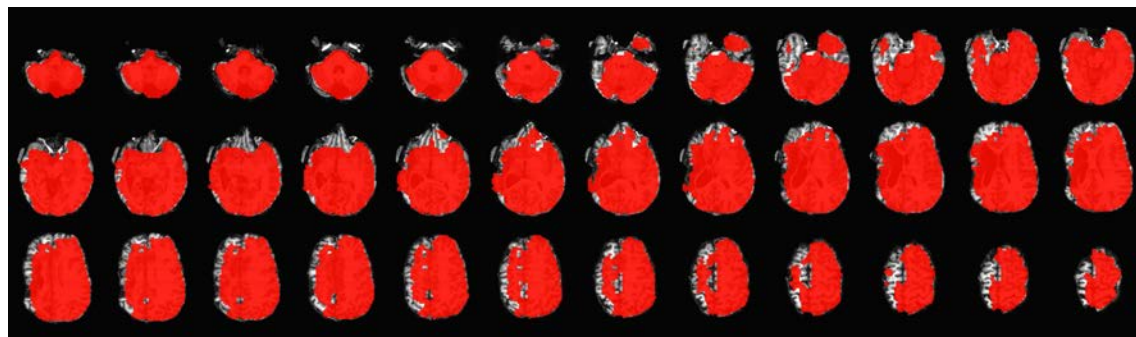

292-001 Left middle cingulate gyrus stimulation

Stimulation site (-4.8, -6.2, 36.0)

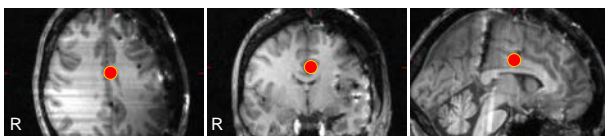

BOLD response

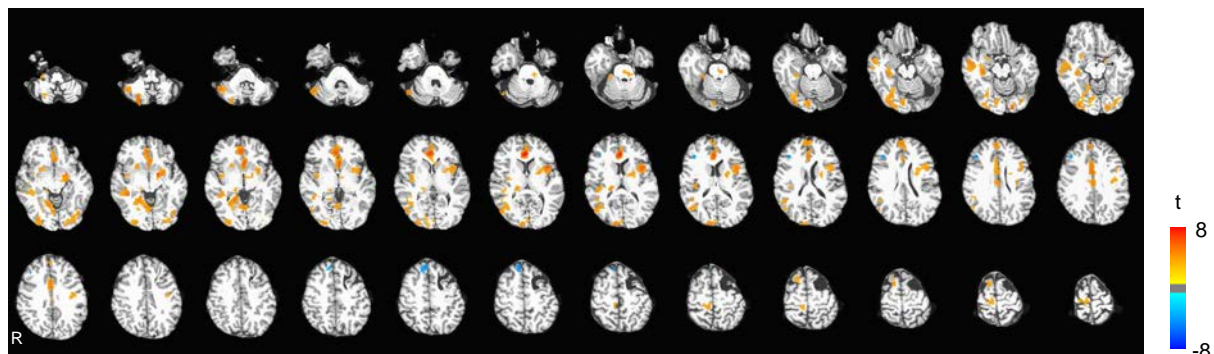

Brain mask

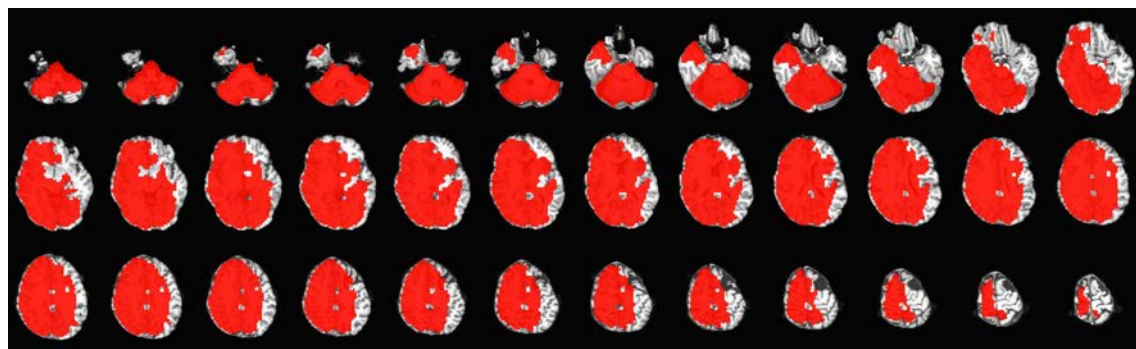

294-001 Right amygdala stimulation  
Stimulation site (23.9, -7.9, -22.6)

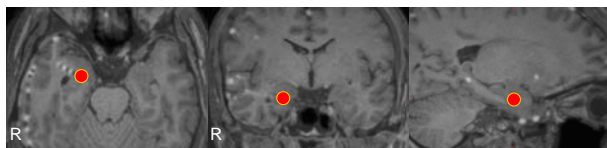

BOLD response

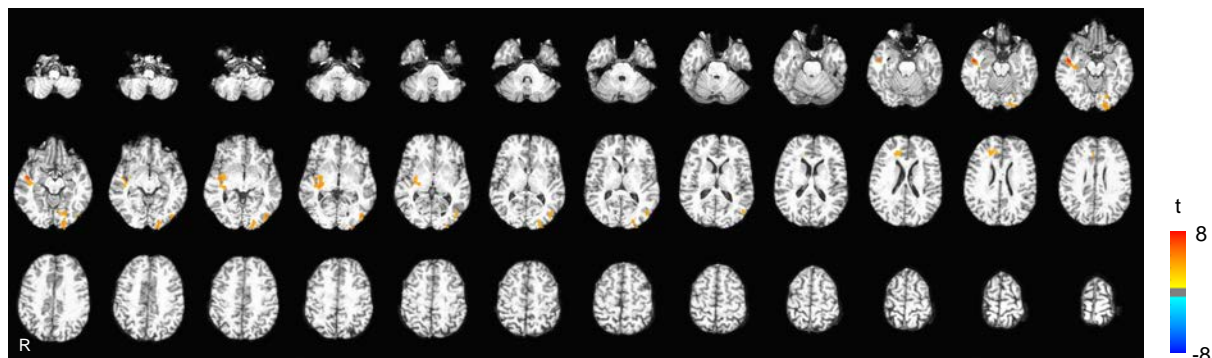

Brain mask

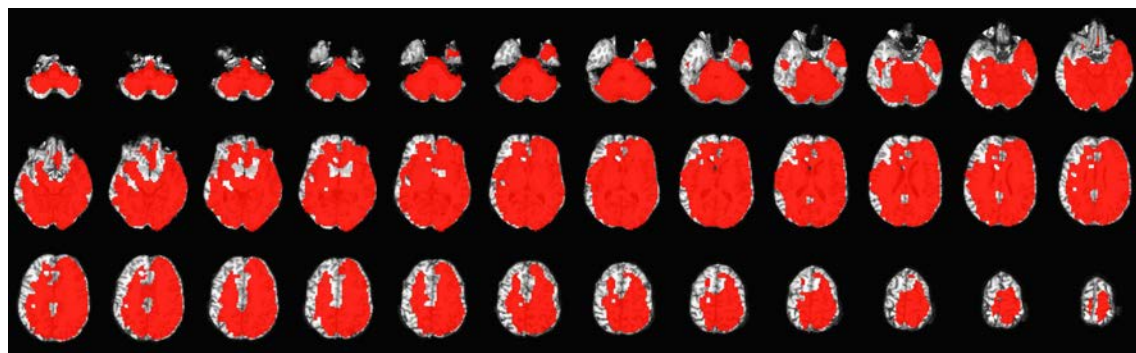



303-001 Right amygdala stimulation

Stimulation site (21.6, -5.5, -18.7)

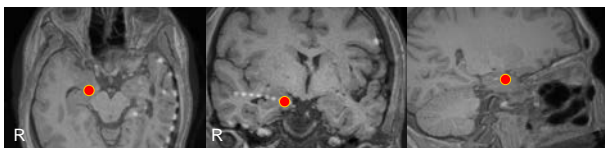

BOLD response

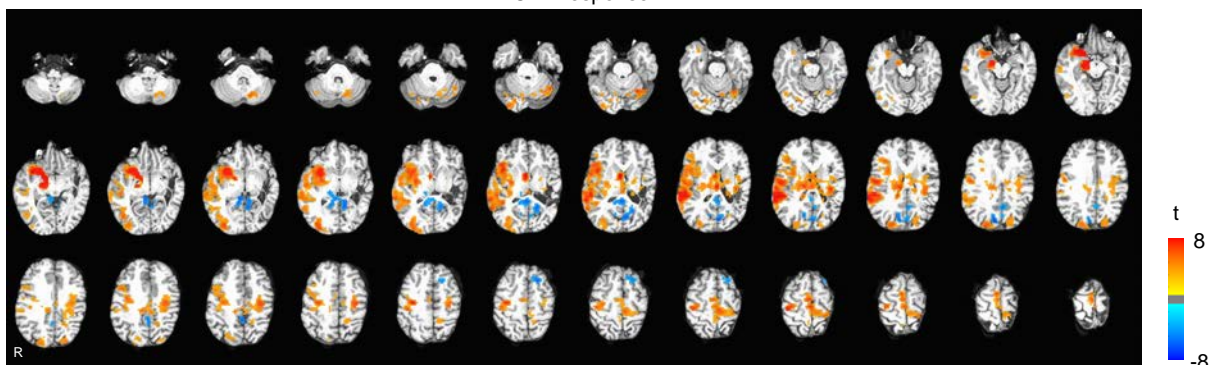

Brain mask

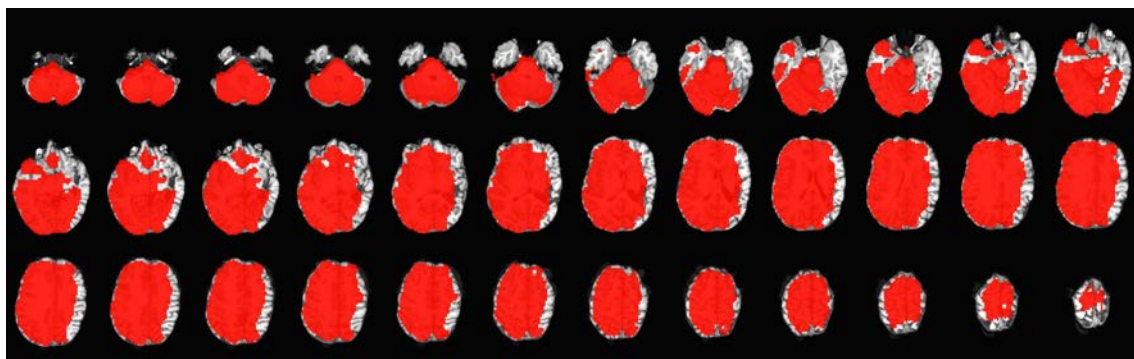

303-004 Right superior temporal sulcus stimulation  
Stimulation site (44.3, -15.9, -9.7)

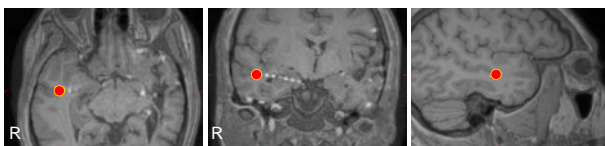

BOLD response

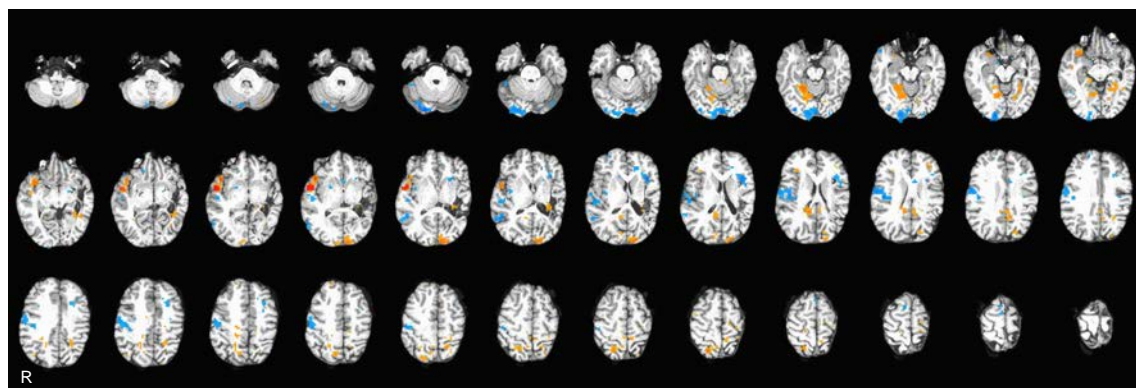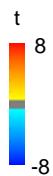

Brain mask

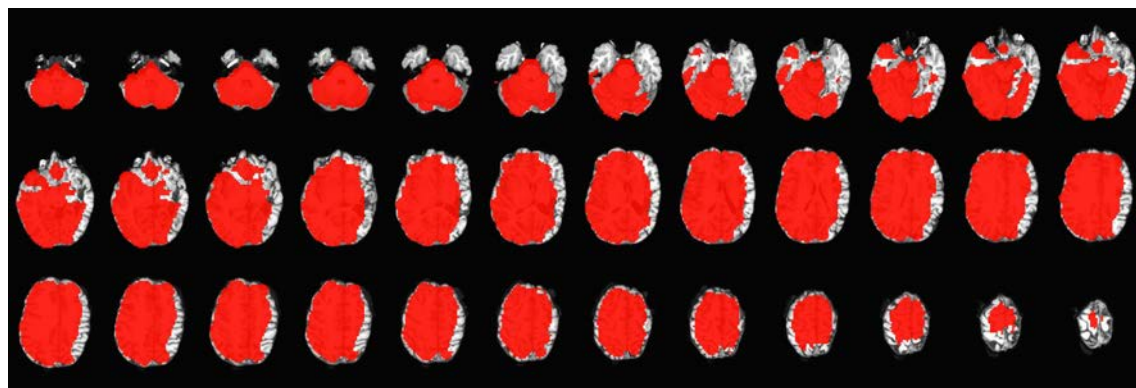

307-004 Left amygdala stimulation  
Stimulation site (-19.9, -2.4, -22.0)

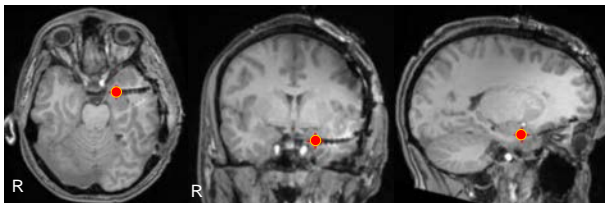

BOLD response

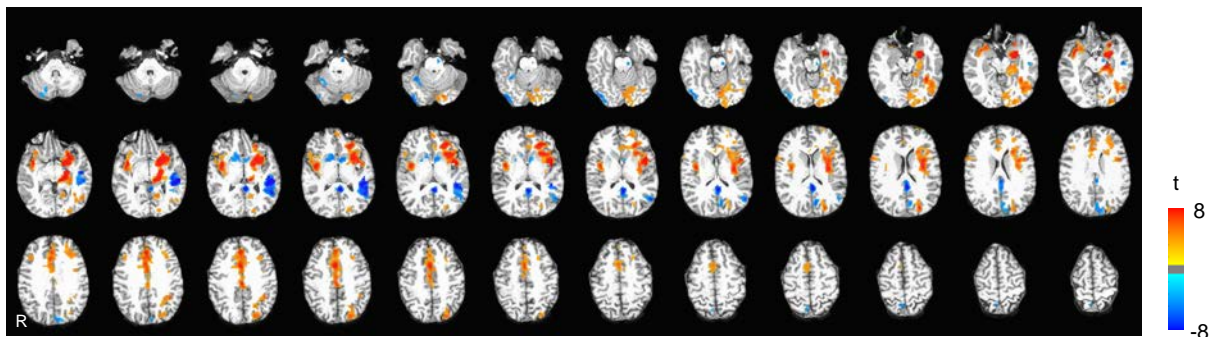

Brain mask

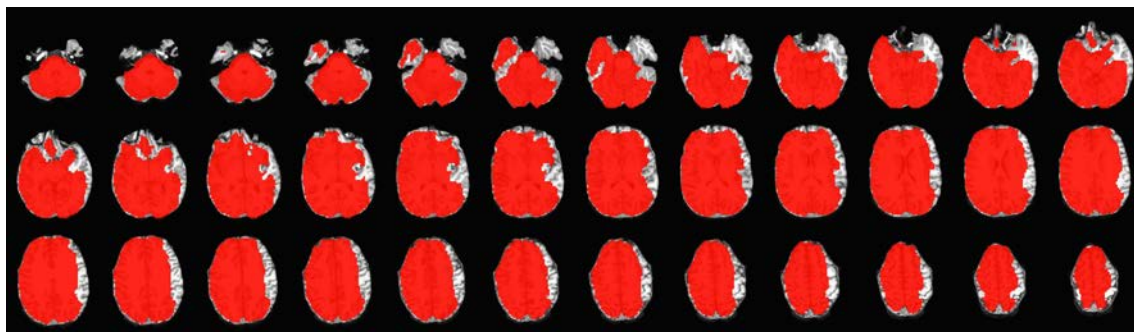

316-003 Right amygdala stimulation  
Stimulation site (28.1, -7.4, -28.4)

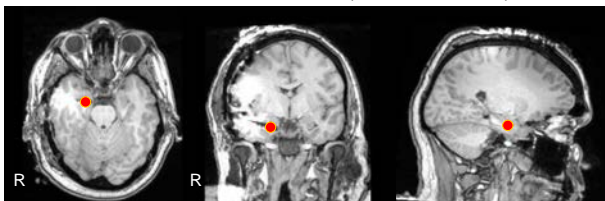

BOLD response

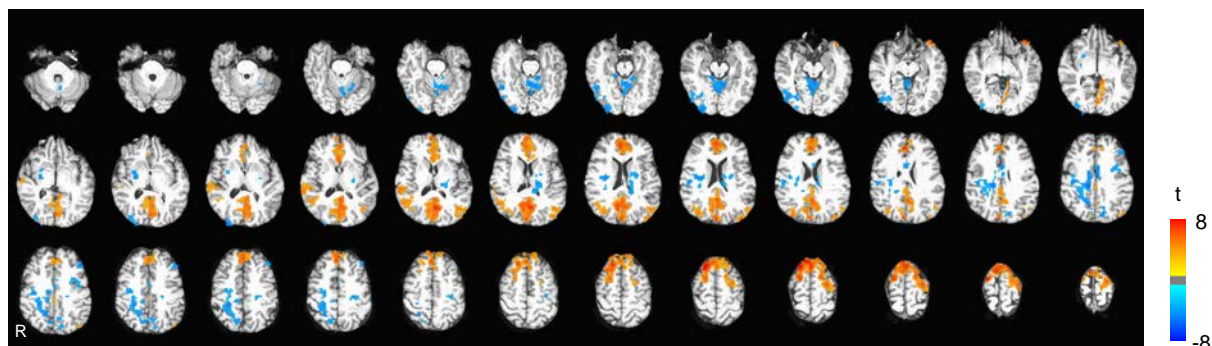

Brain mask

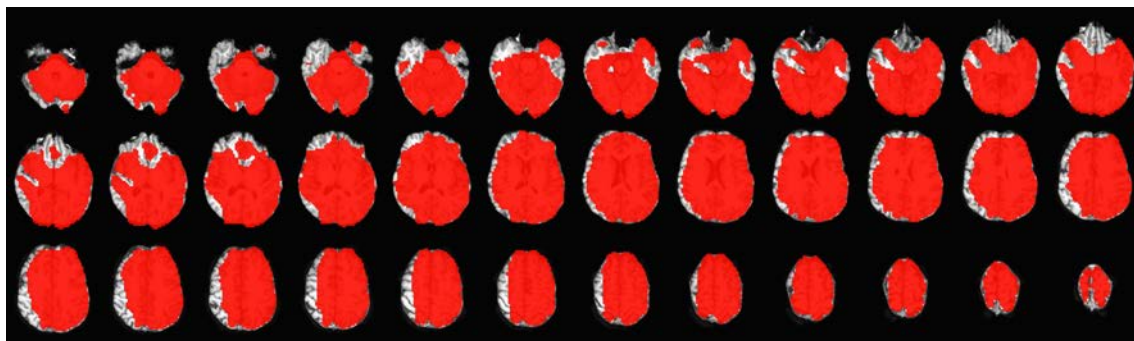



320-003 Left amygdala stimulation  
Stimulation site (-22.0, -6.1, -20.5)

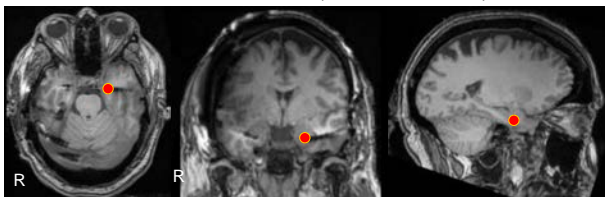

BOLD response

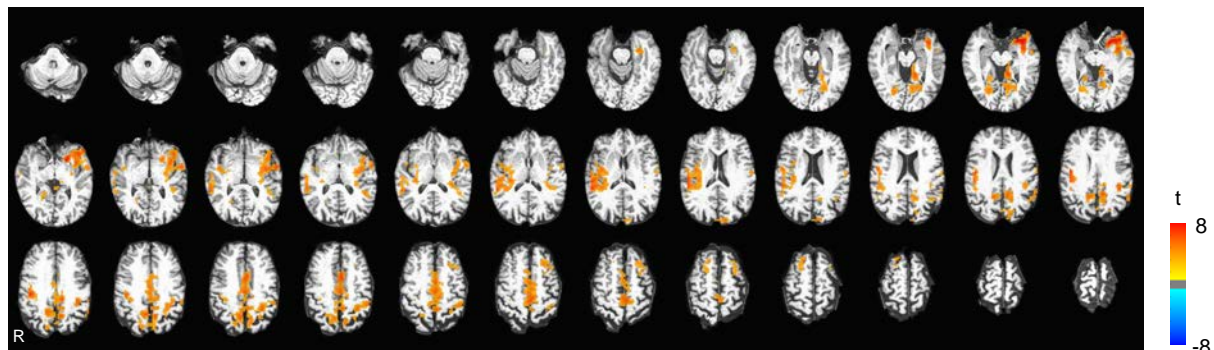

Brain mask

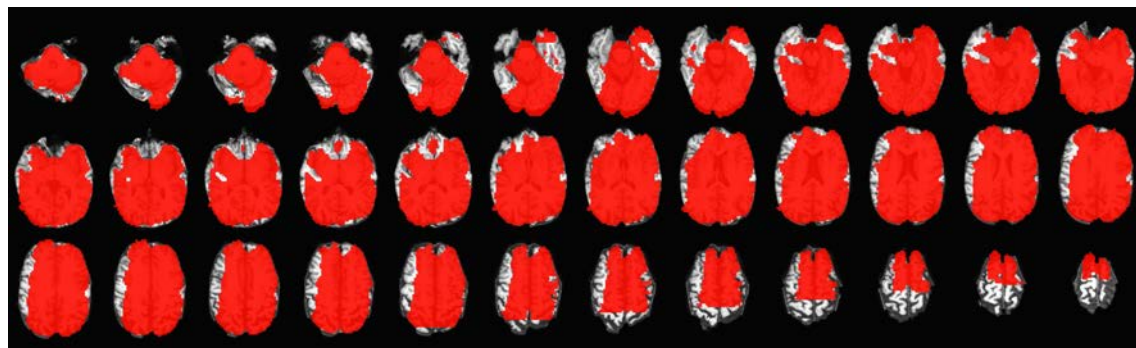

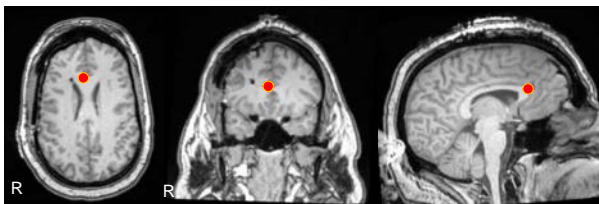

BOLD response

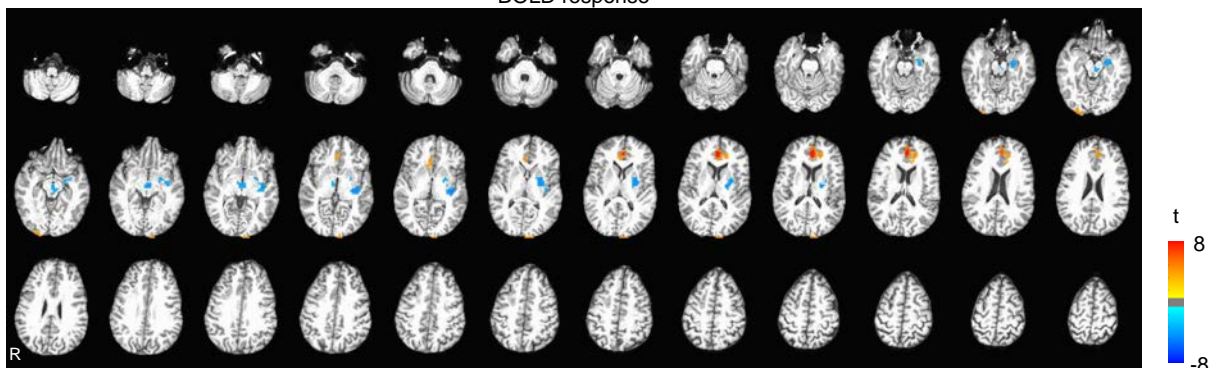

Brain mask

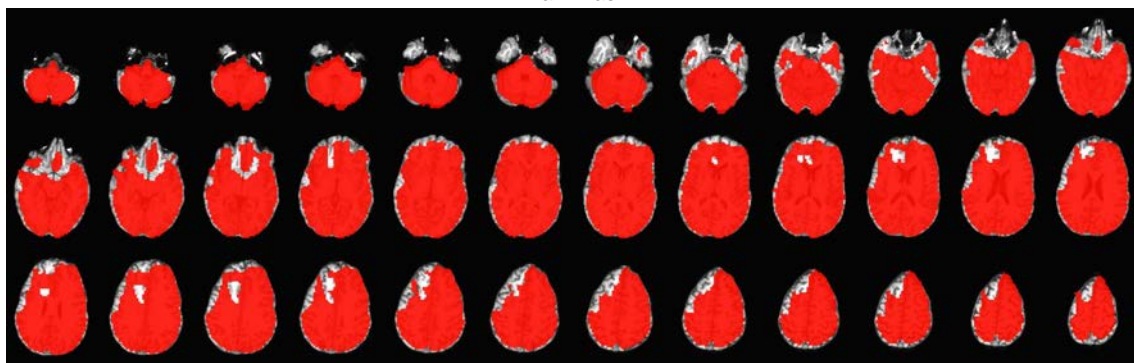

330-007 Left amygdala stimulation  
Stimulation site (27.6, -6.0, -24.2)

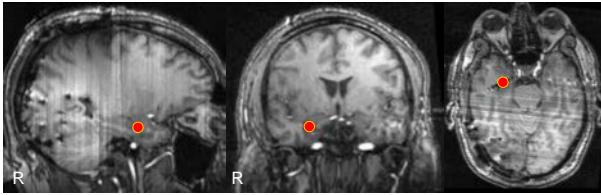

BOLD response

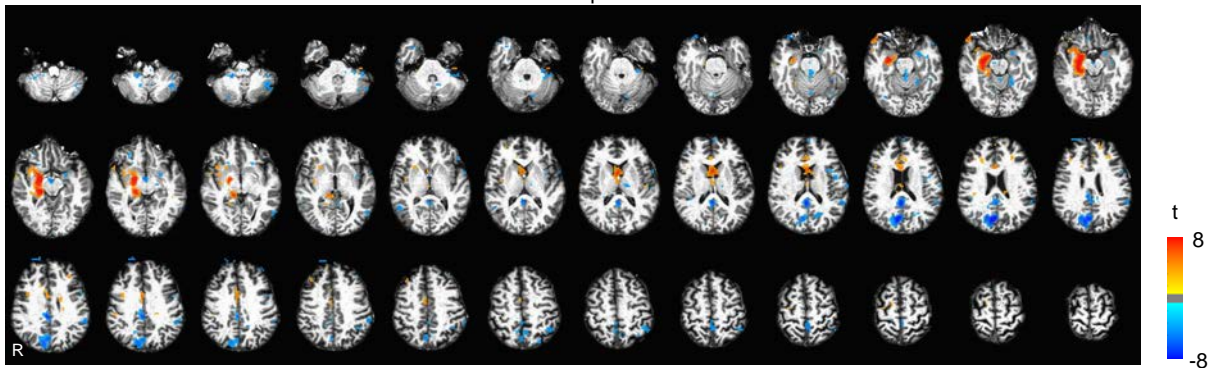

Brain mask

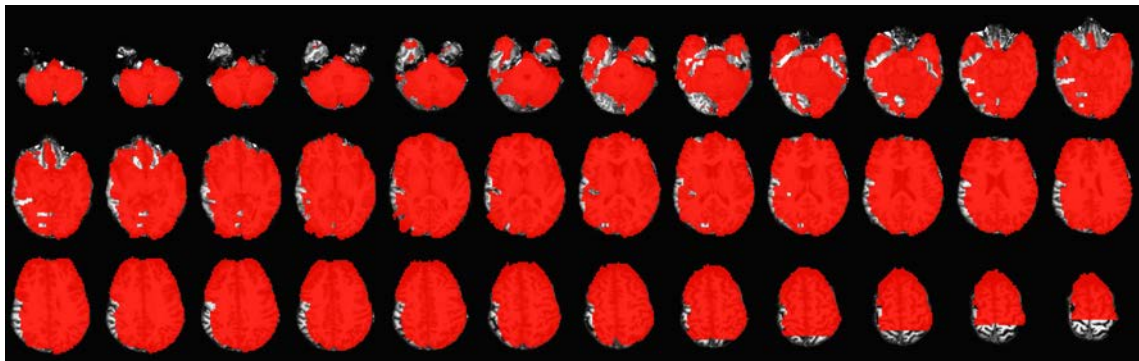



331-004 Left amygdala stimulation  
Stimulation site ( -15.2, -9.50, -24.6)

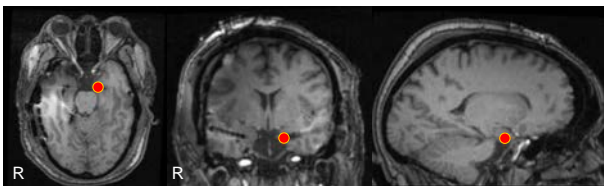

BOLD response

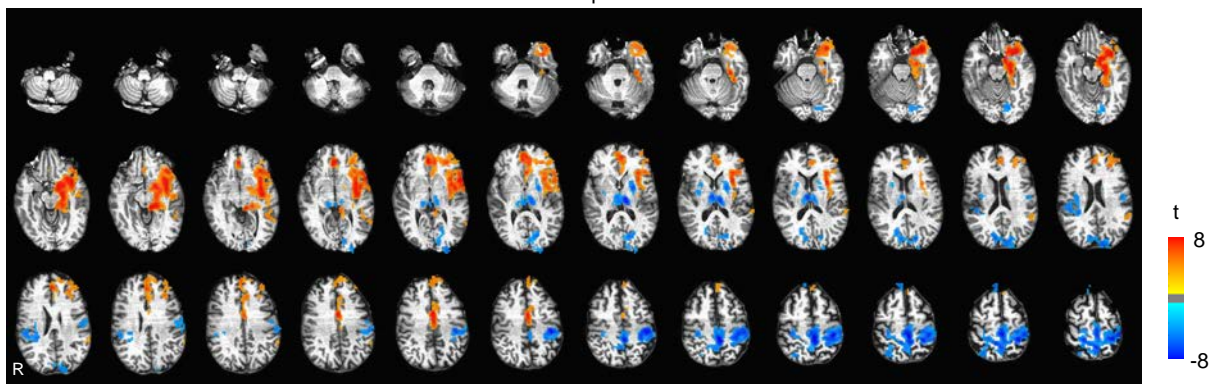

Brain mask

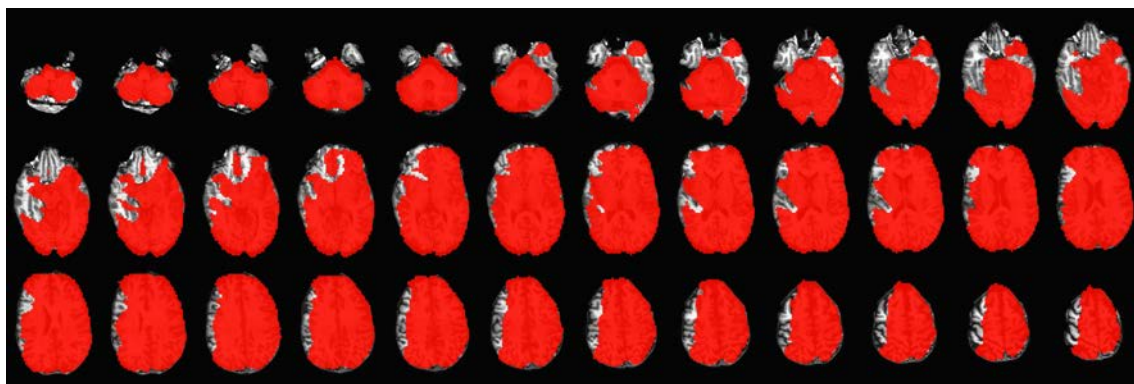



334-005 Left amygdala stimulation  
Stimulation site (-16.3, -10.2, -14.4)

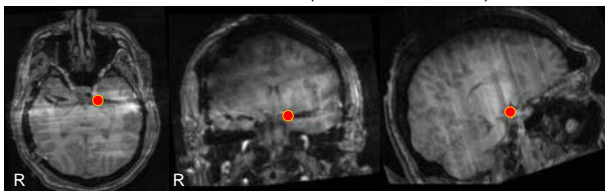

BOLD response

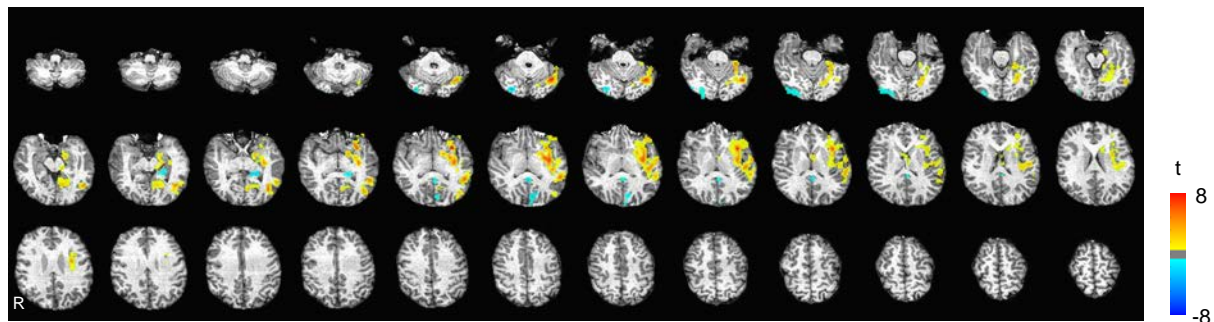

Brain mask

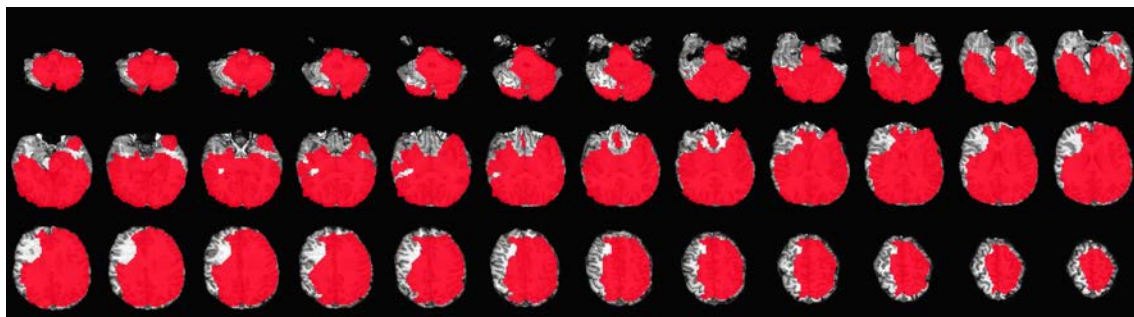

335-005 Left amygdala stimulation  
Stimulation site (-25.8, -4.0, -22.3)

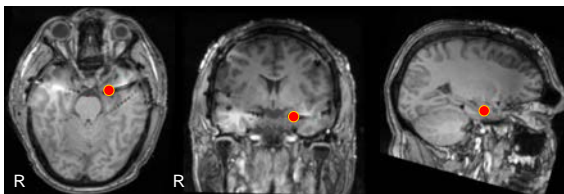

BOLD response

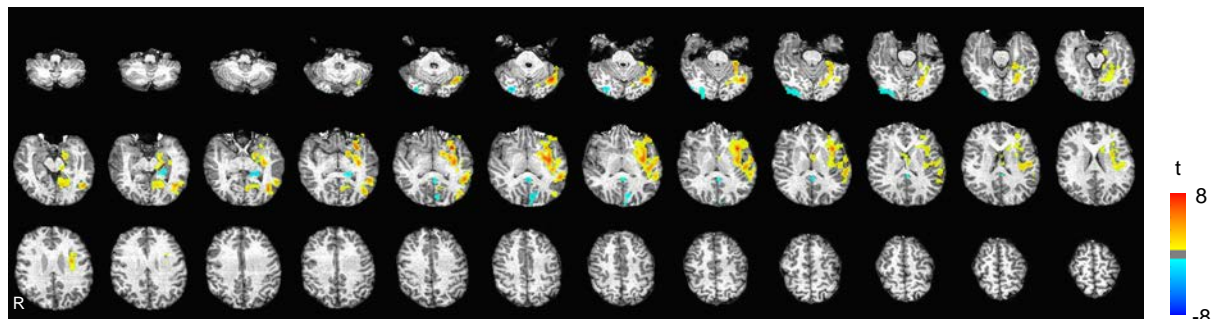

Brain mask

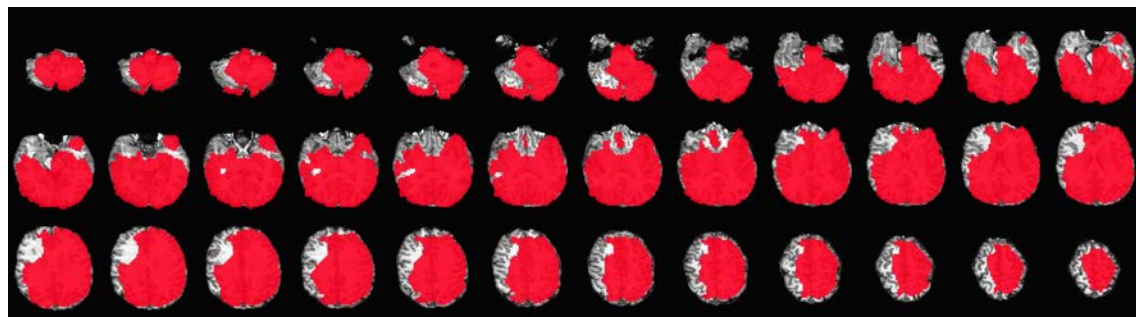

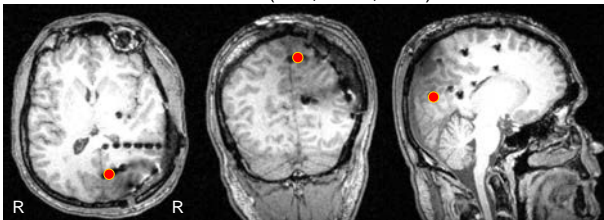

BOLD response

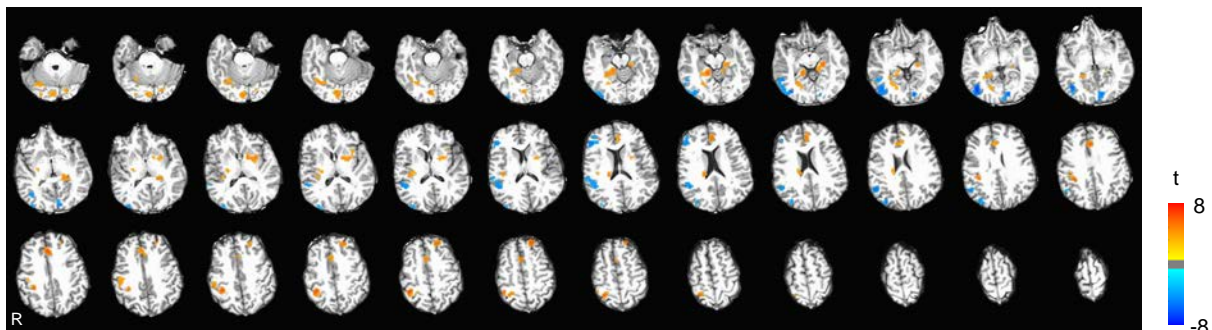

Brain mask

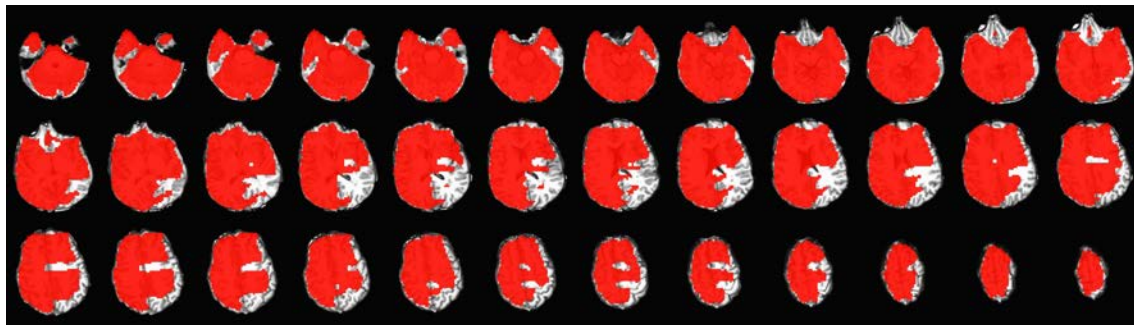

Supplement: NIHMS839694-supplement-2.pdf [file NIHMS839694-supplement-2.pdf]
